# Supplementary material for: Intranasal Delivery of RGD-Containing Osteopontin Heptamer Peptide Confers Neuroprotection in the Ischemic Brain and Augments Microglia M2 Polarization
Source: MDPI journal article supplement (doi:10.3390/ijms22189999), 2021-09-16
Supplement: s1 [file s1]

## Supplementary Materials

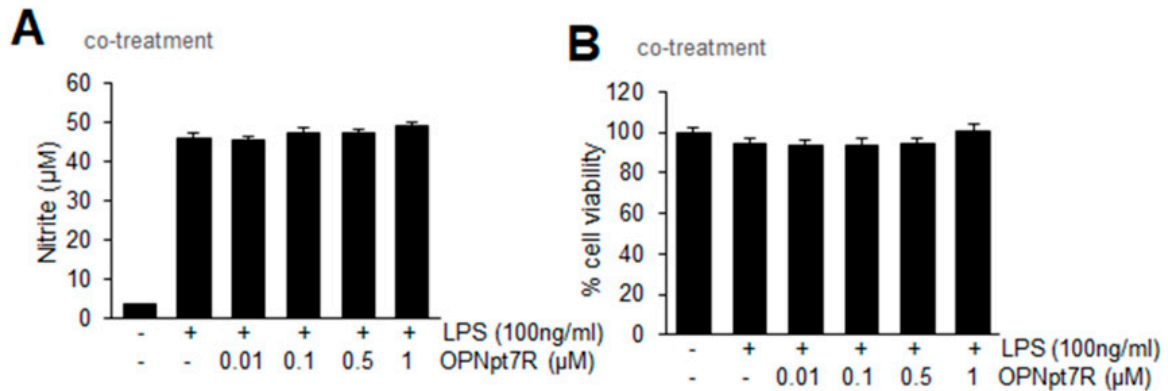

**Figure S1.** No anti-inflammatory effect of OPNpt7R co-treatment in primary microglial cultures. Primary microglial cultures were treated with OPNpt7R (0.01, 0.1, 0.5 or 1 μM) and LPS (100 ng/ml) for 24 h. Nitrite production was measured using the Griess assay (**A**) and cell viability was measured with MTT assay (**B**). Results are presented as mean±SEM ( $n = 4$ ).

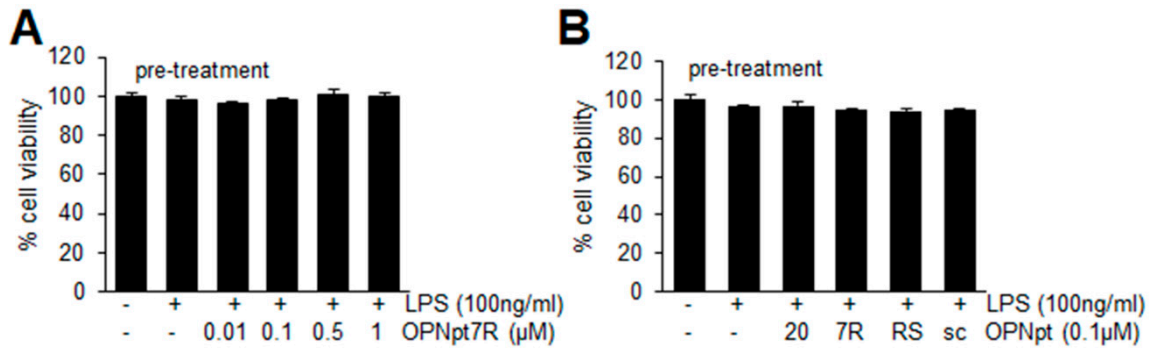

**Figure S2.** Cell viability of OPNpt7R-pre-treated primary microglial cultures after LPS treatment. Primary microglial cultures were pre-incubated with OPNpt7R (0.01, 0.1, 0.5 or 1 μM) for 1 h (**A**) or with 0.1 μM of OPNpt20, OPNpt7R, OPNpt7RS, or OPNpt7R-sc for 1 h (**B**) and treated with LPS (100 ng/ml) for 24 h. Cell viability was measured with MTT assay (**B**). Results are presented as mean±SEM ( $n = 4$ ).

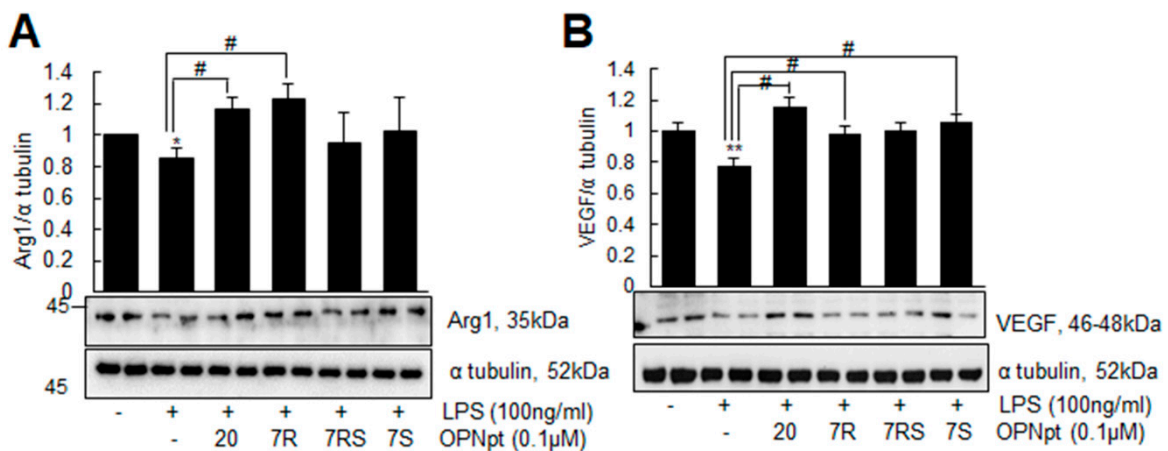

**Figure S3.** Comparison of anti-inflammatory effects of OPNpt7R with OPNpt20 and OPNpt7RS. Primary microglial cultures were pre-incubated with 0.1 μM of OPNpt20, OPNpt7R, or OPNpt7RS for 1 h and treated with LPS (100 ng/ml). Levels of Arg1 (**A**) and VEGF (**B**) were determined by

immunoblotting, and the results are presented as mean $\pm$ SEM ( $n = 3$ ). \* $p < 0.05$ , \*\* $p < 0.01$  versus LPS-treated cells, # $p < 0.05$  between indicated groups.

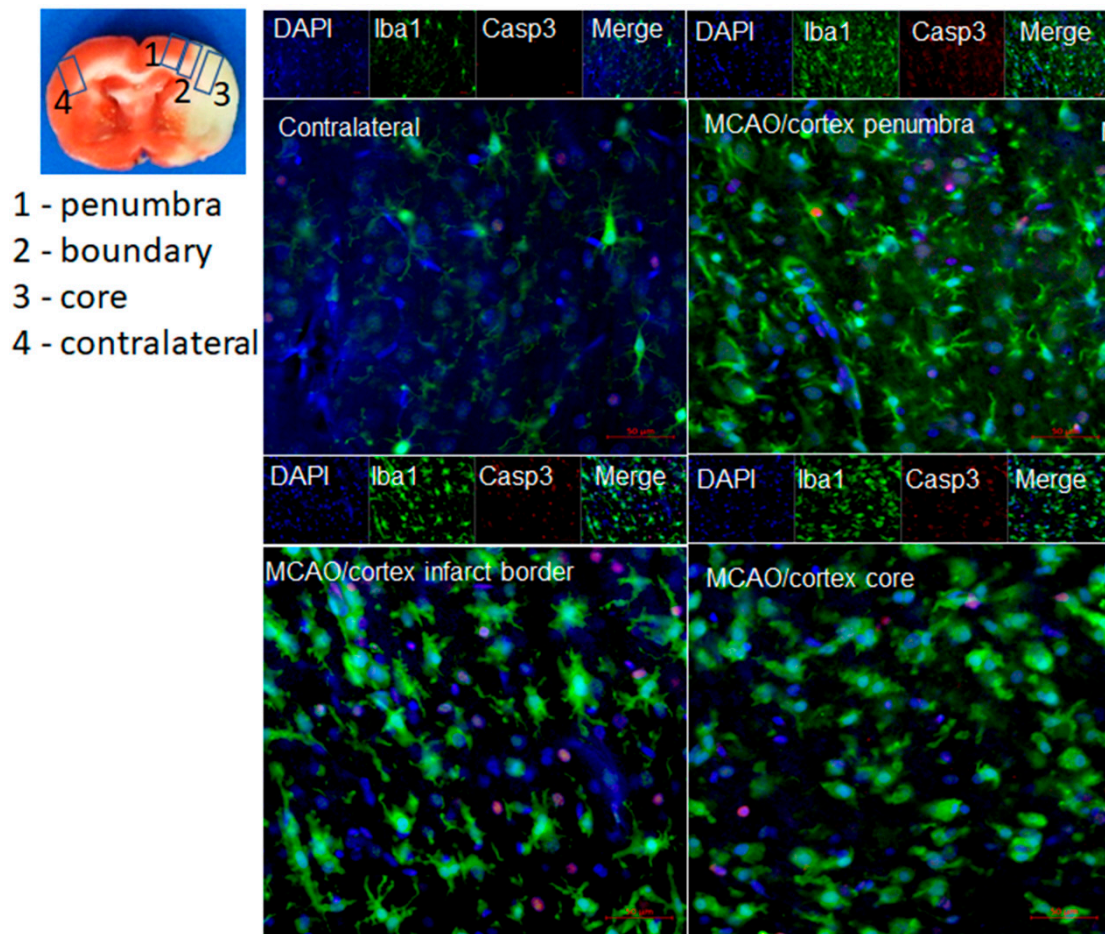

**Figure S4.** Activation of microglia in the cortical penumbra, infarct boundary, and infarct core of the post-ischemic brain. Coronal brain sections were prepared from 3 day after MCAO and processed for double immunofluorescence staining with anti-Iba1 and anti-activated caspase 3 antibodies and DAPI. Representative images were obtained from the cortical penumbra, infarct boundary, and cortical core of the ipsilateral hemisphere and also from contralateral hemisphere.

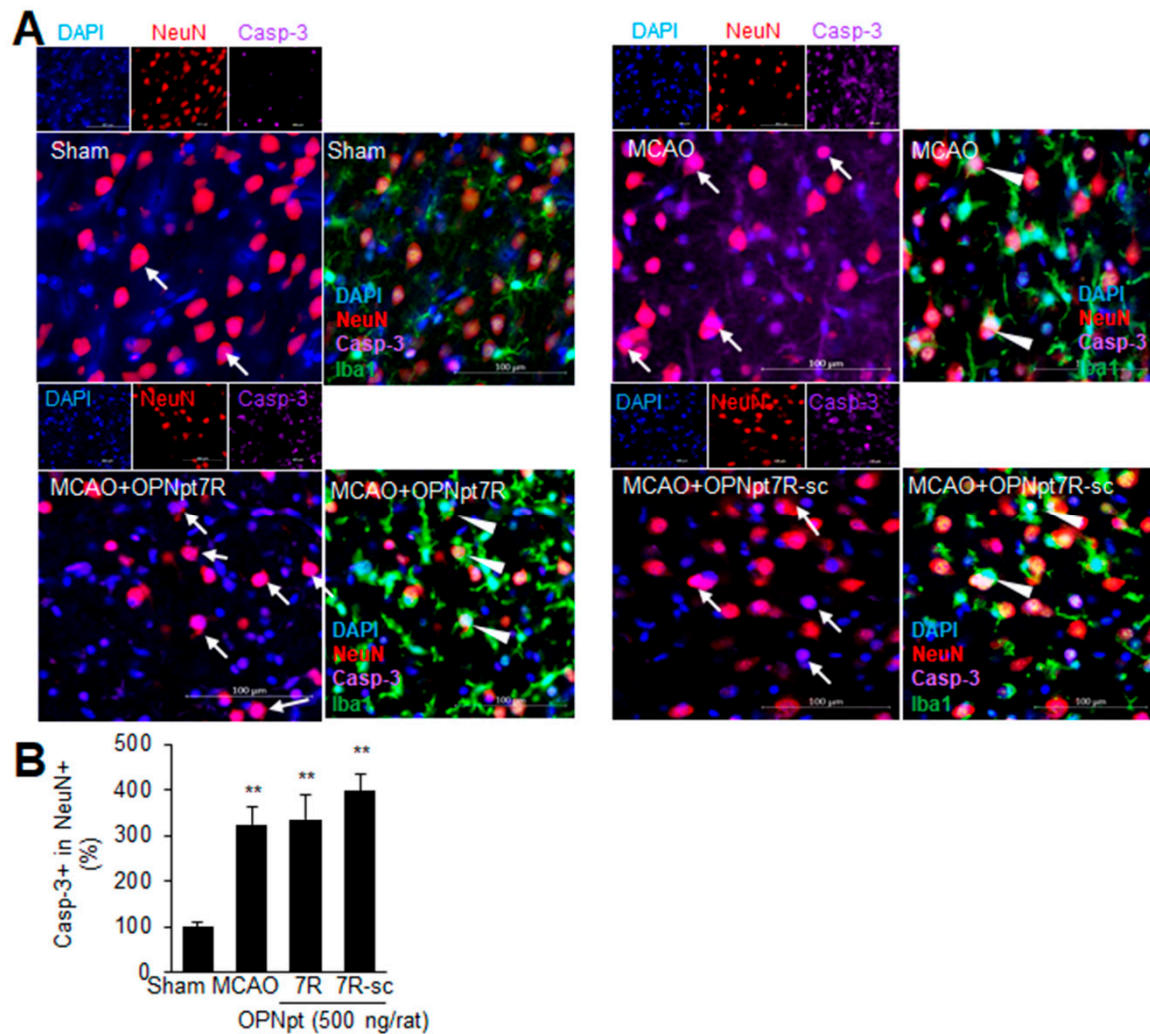

**Figure S5.** Activation of microglia in the cortical penumbra, infarct boundary, and infarct core of the post-ischemic brain. Coronal brain sections were prepared from 3 day after MCAO and processed for immunofluorescence staining with anti-neuN, anti-Iba1 and anti-activated caspase 3 antibodies and DAPI. Representative images were obtained from the cortical core of the ipsilateral hemisphere and the number of Caspase 3+ immunoreactivity in NeuN+ cells (arrows) were counted (0.2 mm<sup>2</sup>) and presented as mean±SEM. Images in the right panel presented localization of Caspase 3+/NeuN+ immunoreactivity in Iba+ cells (arrow head).
